# Supplementary material for: Recovery of children following hospitalisation for complicated severe acute malnutrition
Source: PubMed Central journal article supplement (PMC8932709; doi:10.1111/mcn.13302), 2021-12-22

Supplementary figure 1: Flow diagram

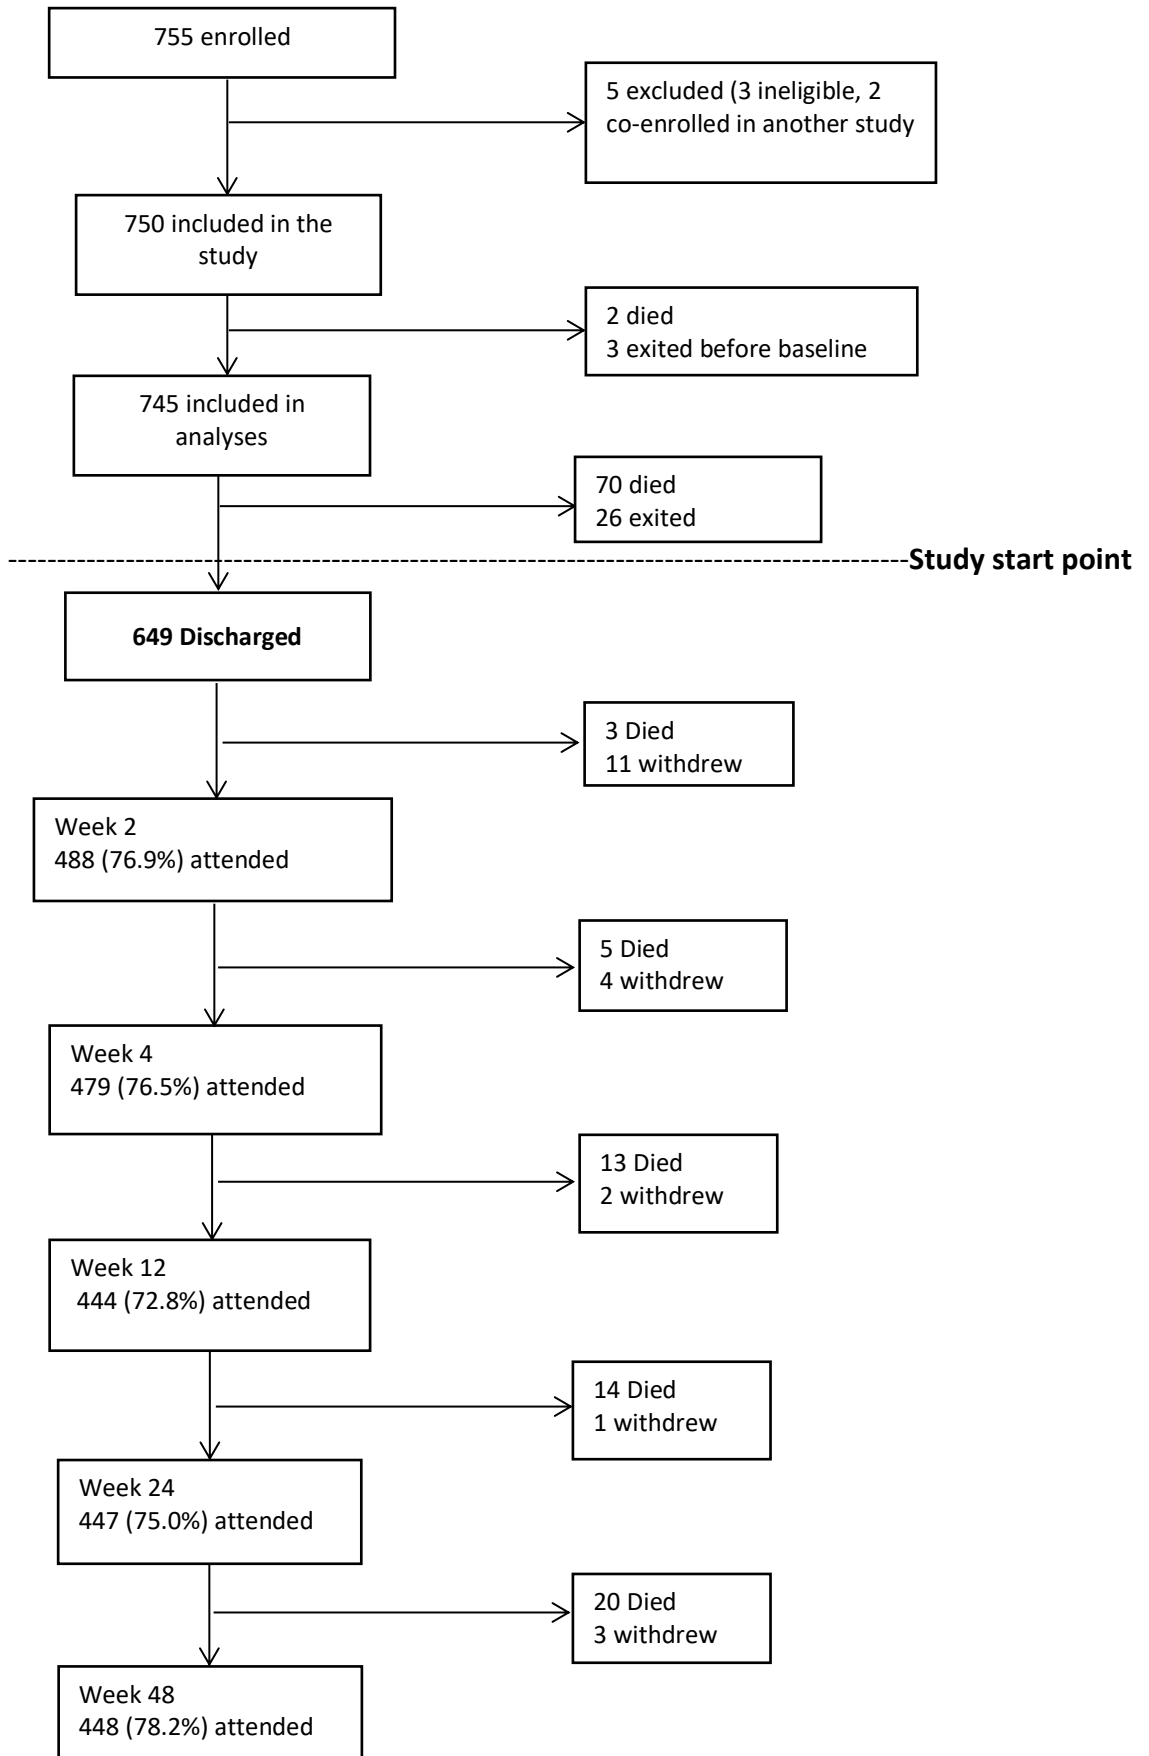

Supplement: MCN-18-e13302-s004.pdf [file MCN-18-e13302-s004.pdf]
